# Supplementary material for: Determination of seven restricted halogenated salicylanilides in cosmetics by high performance liquid chromatography
Source: Royal Society of Chemistry journal article supplement (doi:10.1039/c6ay00916f), 2016-01-01

## Supporting information

Comparison of excitation wavelength ( $\lambda_{em}=480$  nm) and emission wavelength ( $\lambda_{ex}=325$  nm)

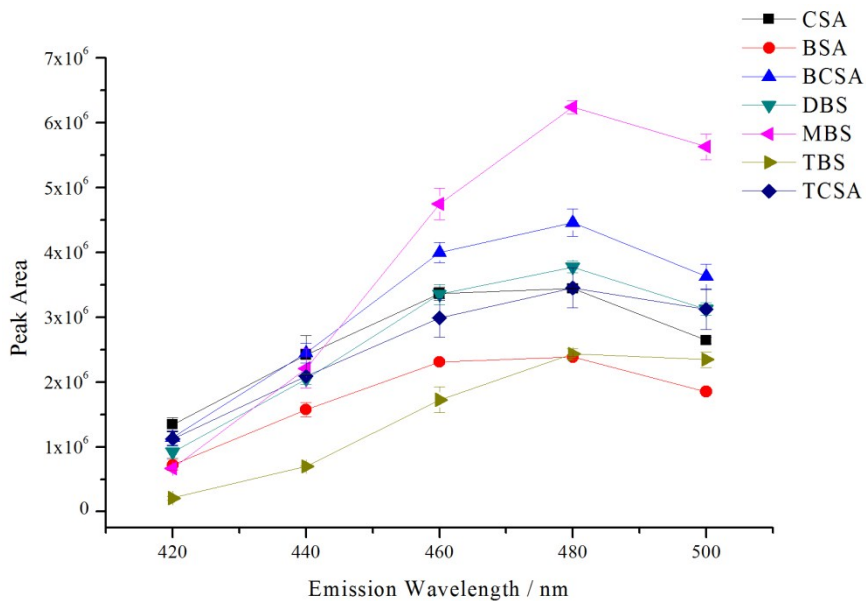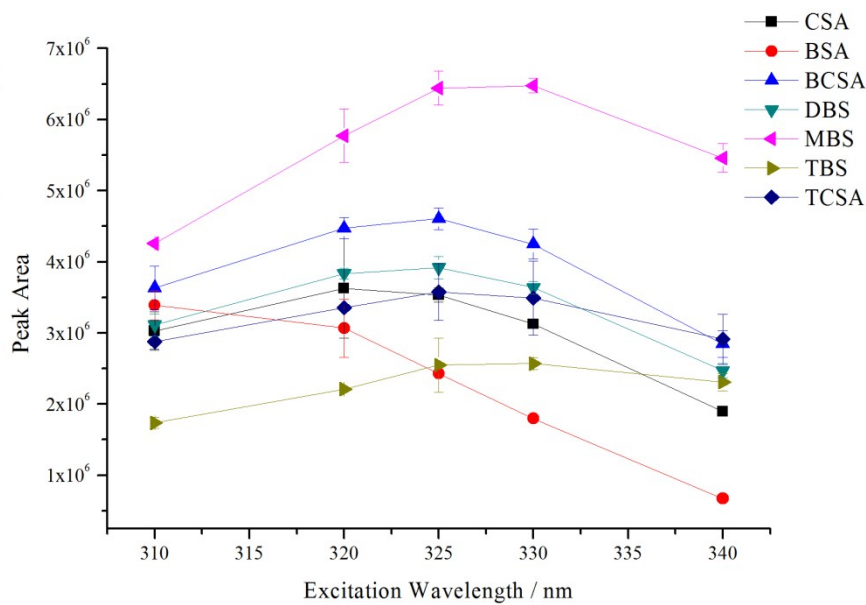

Supplement: c6ay00916f1.pdf [file c6ay00916f1.pdf]
